# Supplementary material for: Nitrogenated holey two-dimensional structures
Source: Springer Nature journal article supplement (doi:10.1038/ncomms7486), 2015-03-06
Supplement: 41467_2015_BFncomms7486_MOESM1129_ESM.pdf [file 41467_2015_BFncomms7486_MOESM1129_ESM.pdf]

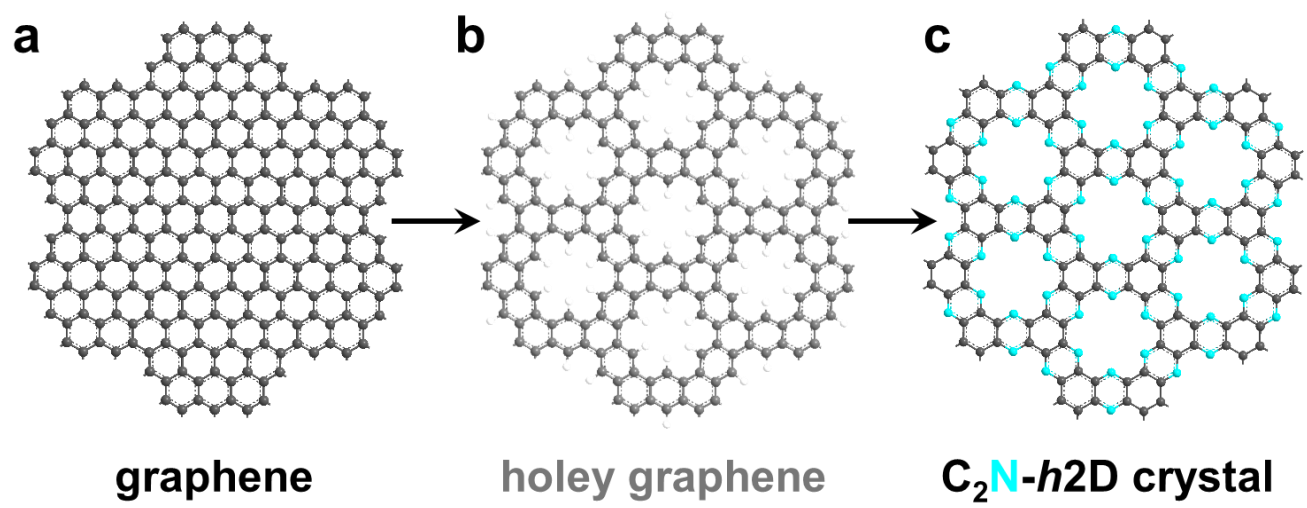

**Supplementary Figure 1** | Schematic presentation of the difference among two-dimensional structures. **(a)** Graphene (1<sup>st</sup> generation). **(b)** Holey graphene (2<sup>nd</sup> generation, not yet been realized). **(c)** Holey nitrogenated graphene (3<sup>rd</sup> generation, designated as C<sub>2</sub>N-*h*2D crystal).

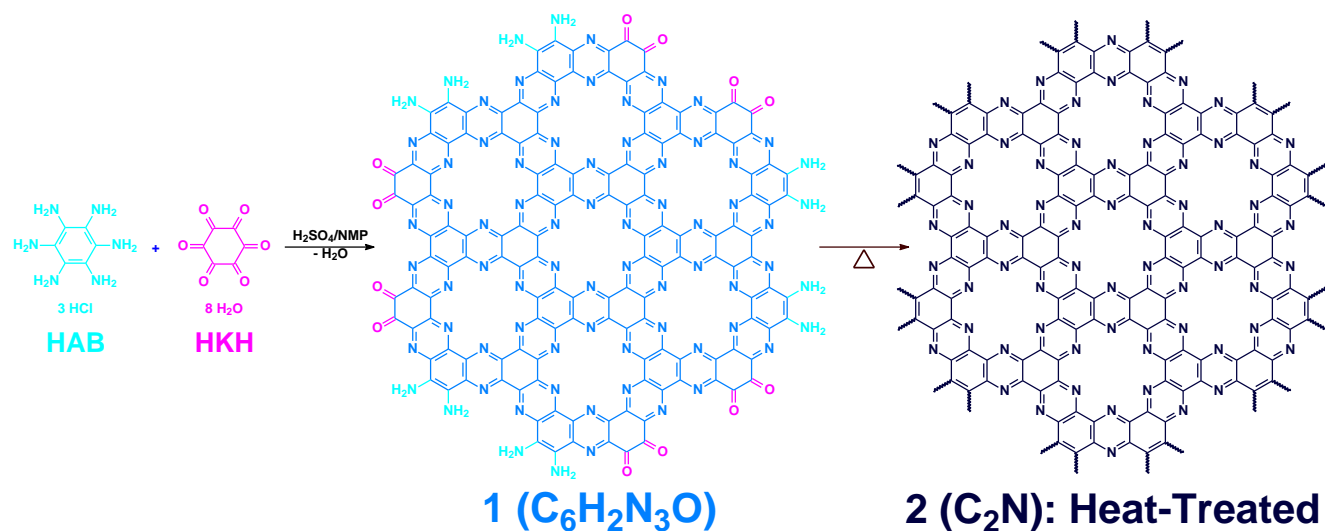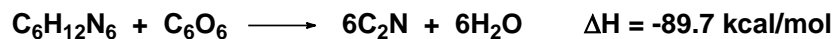

**Supplementary Figure 2** | Schematic presentation for the formation of the C<sub>2</sub>N-*h*2D crystal with edge groups and thermodynamics of reaction. Reaction enthalpy ( $\Delta H$ ), calculated with the PBE density functional theory, is found to be -89.7 kcal/unit mol. After heat-treatment, bound small molecules (H<sub>2</sub>O, O<sub>2</sub>, and etc.) and edge groups from structure **1** could be thermally stripped off to give the heat-treated C<sub>2</sub>N holey structure **2**.

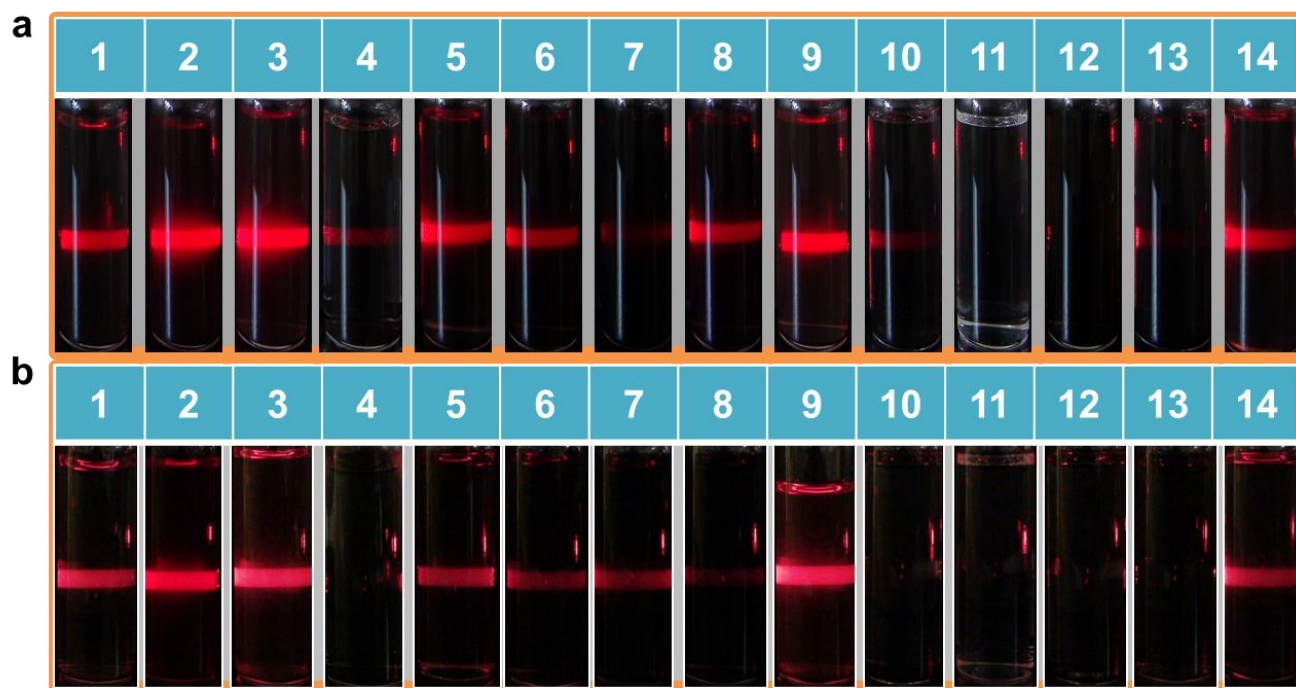

**Supplementary Figure 3** | Solubility of the C<sub>2</sub>N-h<sub>2</sub>D crystal in various solvents: **(a)** After 30s. **(b)** After 1 week. (1) water; (2) acetic acid; (3) MeOH; (4) 1M HCl; (5) NMP; (6) DMF; (7) DMSO; (8) DMAc; (9) acetone; (10) toluene; (11) THF; (12) 1M NaOH; (13) benzene; (14) dichlorobenzene.

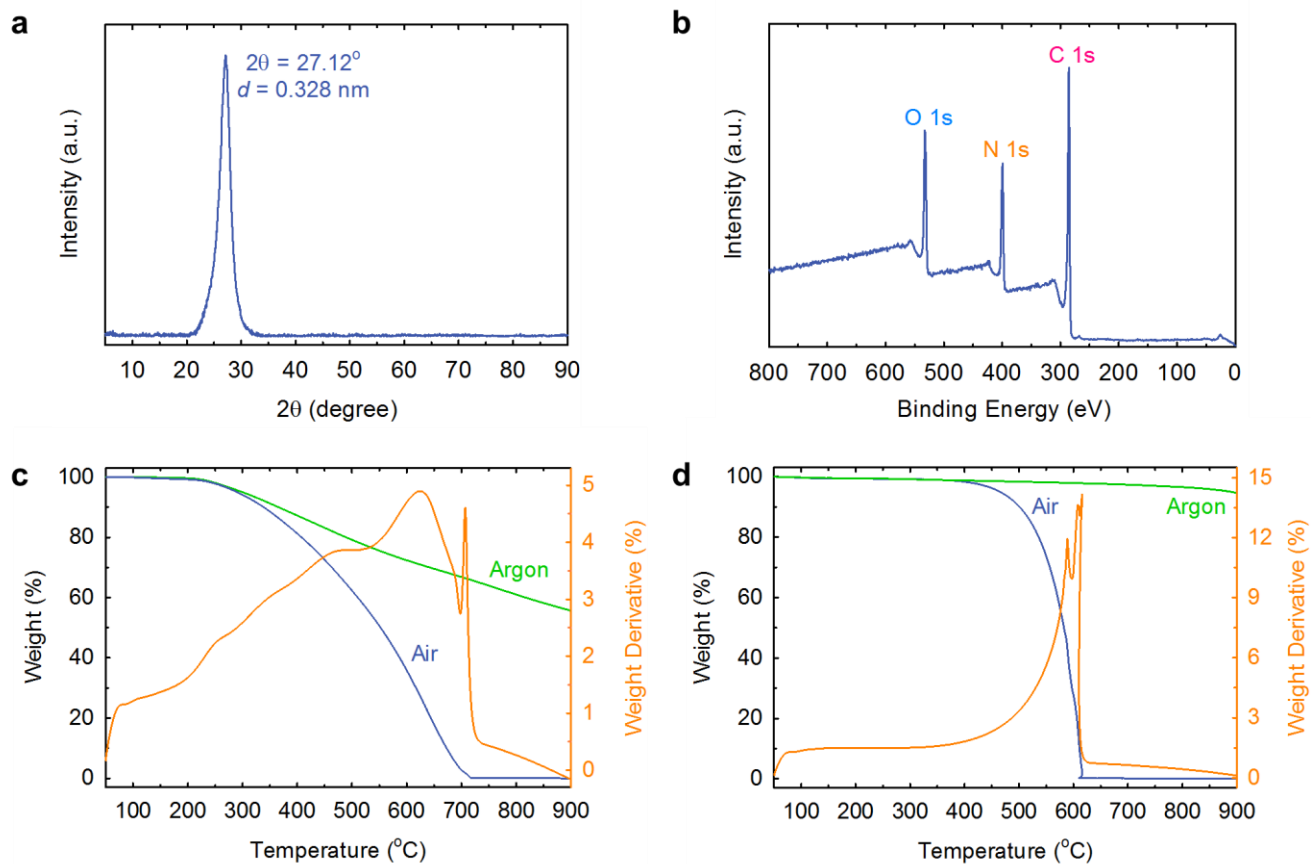

**Supplementary Figure 4** | Analysis of the as-prepared  $C_2N-h_2D$  crystal: **(a)** Powder XRD pattern from the as-prepared sample. **(b)** XPS survey spectrum showing C1s, N1s and O1s. High resolution XPS spectra for C1s, N1s and O1s are presented in Fig. S5. TGA thermograms obtained with a heating rate of 10 °C/min in air and argon: **(c)** As-prepared sample. **(d)** Heat-treated sample at 700 °C.

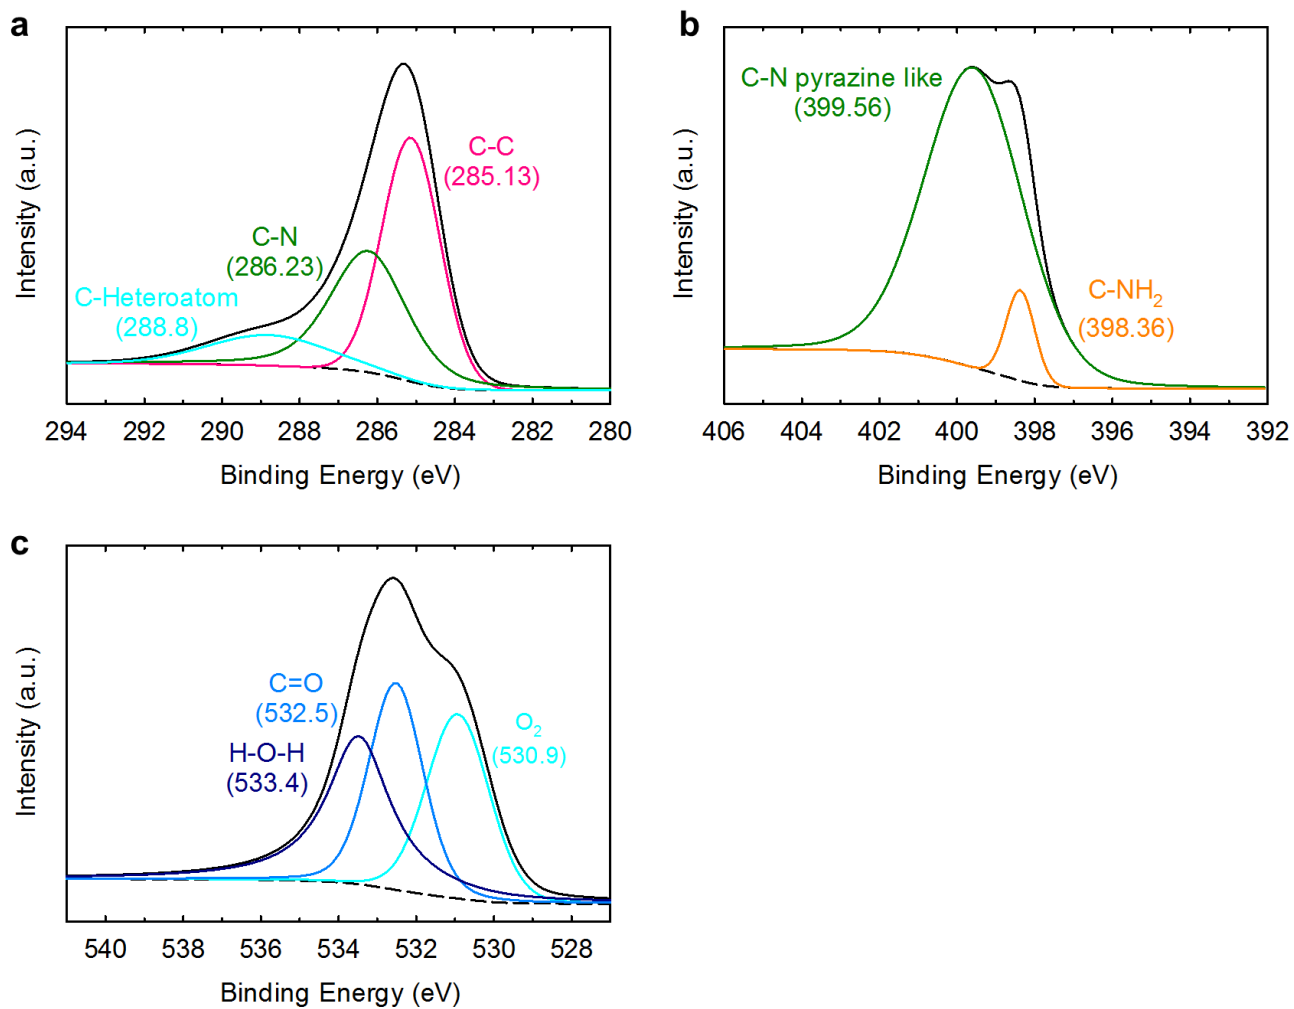

**Supplementary Figure 5** | Deconvoluted XPS spectra of the C<sub>2</sub>N-*h*2D crystal: **(a)** C 1s. **(b)** N 1s. **(c)** O 1s.

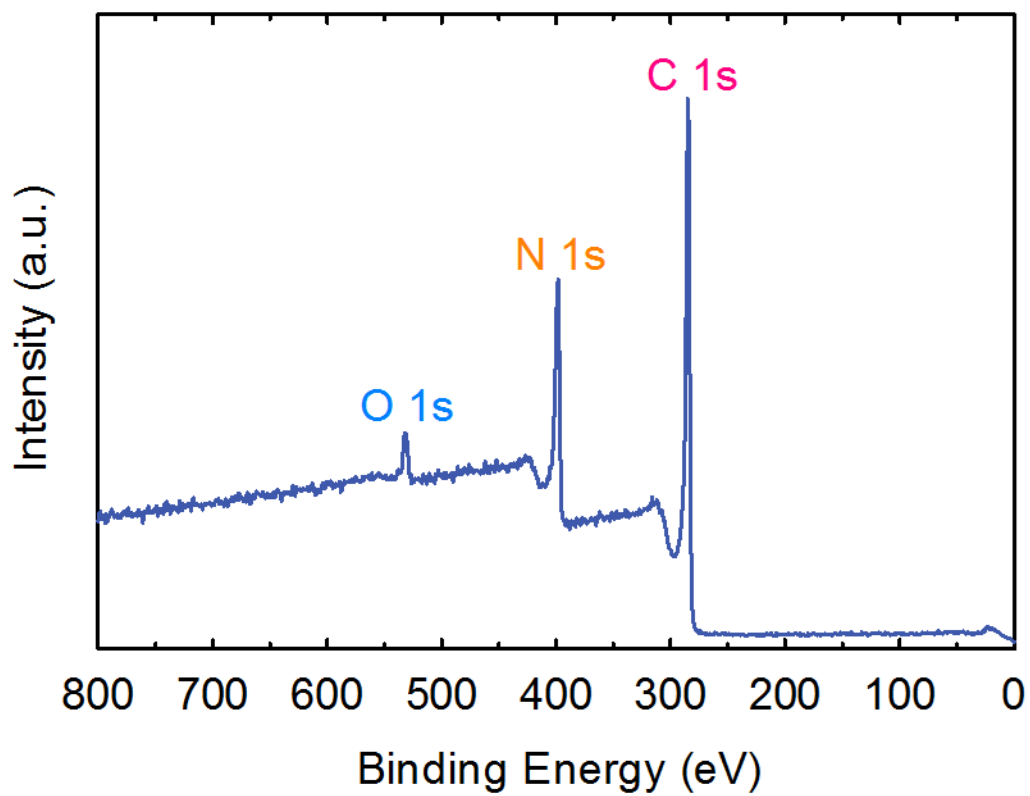

**Supplementary Figure 6** | XPS survey spectrum of the heat-treated C<sub>2</sub>N-h<sub>2</sub>D crystal at 700 °C, showing C 1s, N 1s and reduced O1s compared with as-prepared spectrum (Fig. S4b).

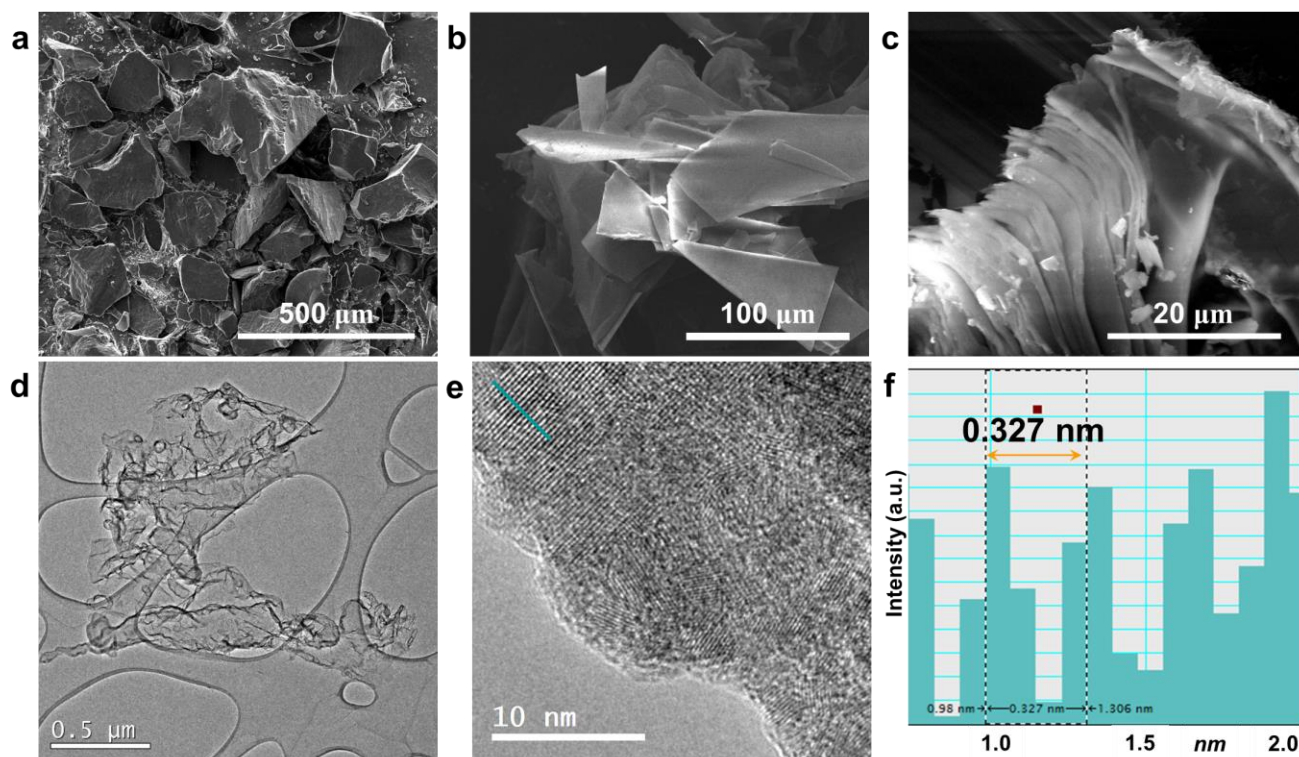

**Supplementary Figure 7** | SEM images of the C<sub>2</sub>N-h<sub>2</sub>D crystal: (a) As-prepared sample. (b) Heat-treated flakes. (c) Edge-on view of heat-treated flakes. TEM images of the C<sub>2</sub>N-h<sub>2</sub>D crystal: (d) At low-magnification. (e) At high-magnification. (f) The interlayer distance ( $d = 0.327$  nm) estimated along the dark green line in (e). The interlayer distance of 0.327 nm is very close to that obtained from XRD pattern (0.328 nm, Fig. S4a).

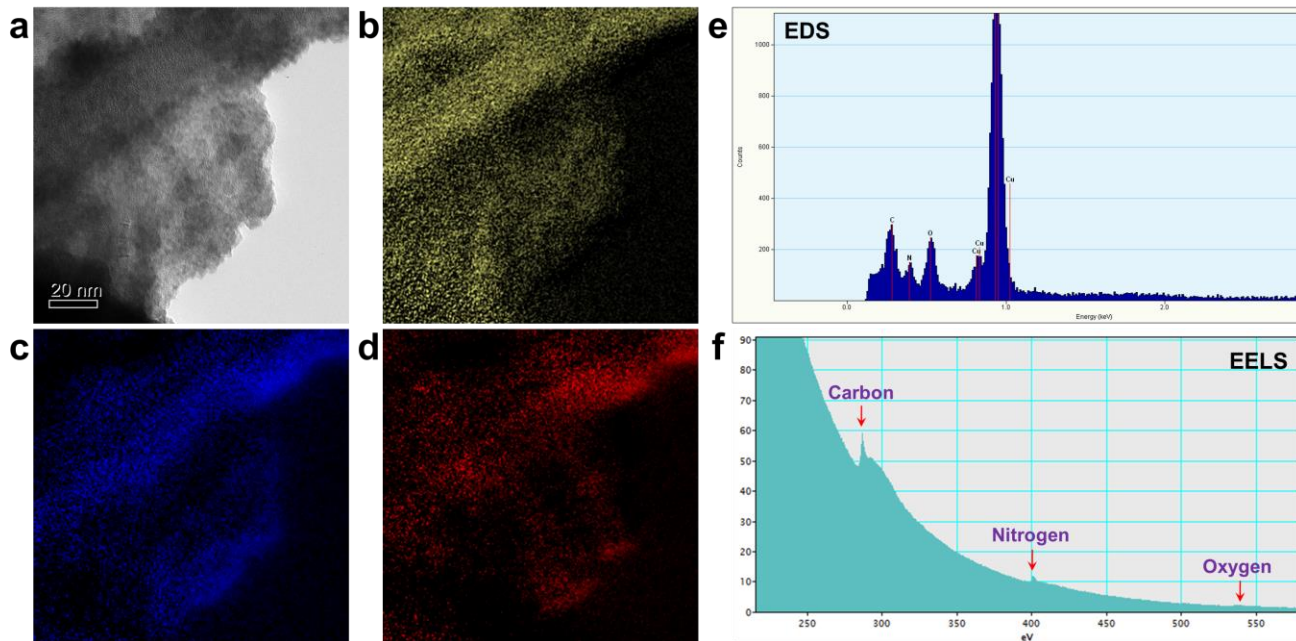

**Supplementary Figure 8** | Energy-filtered TEM images of the as-prepared C<sub>2</sub>N-h<sub>2</sub>D crystal: **(a)** Zero-loss image. **(b)** Carbon mapping. **(c)** Nitrogen mapping. **(d)** Oxygen mapping. **(e)** Energy dispersive X-ray spectroscopy (EDX) spectrum showing the elemental composition (C, N and O) from the TEM image **(a)**. **(f)** Electron energy loss spectroscopy (EELS) spectrum from the TEM image **(a)**. Respective values of carbon, nitrogen and oxygen contents are very close to theoretical values.



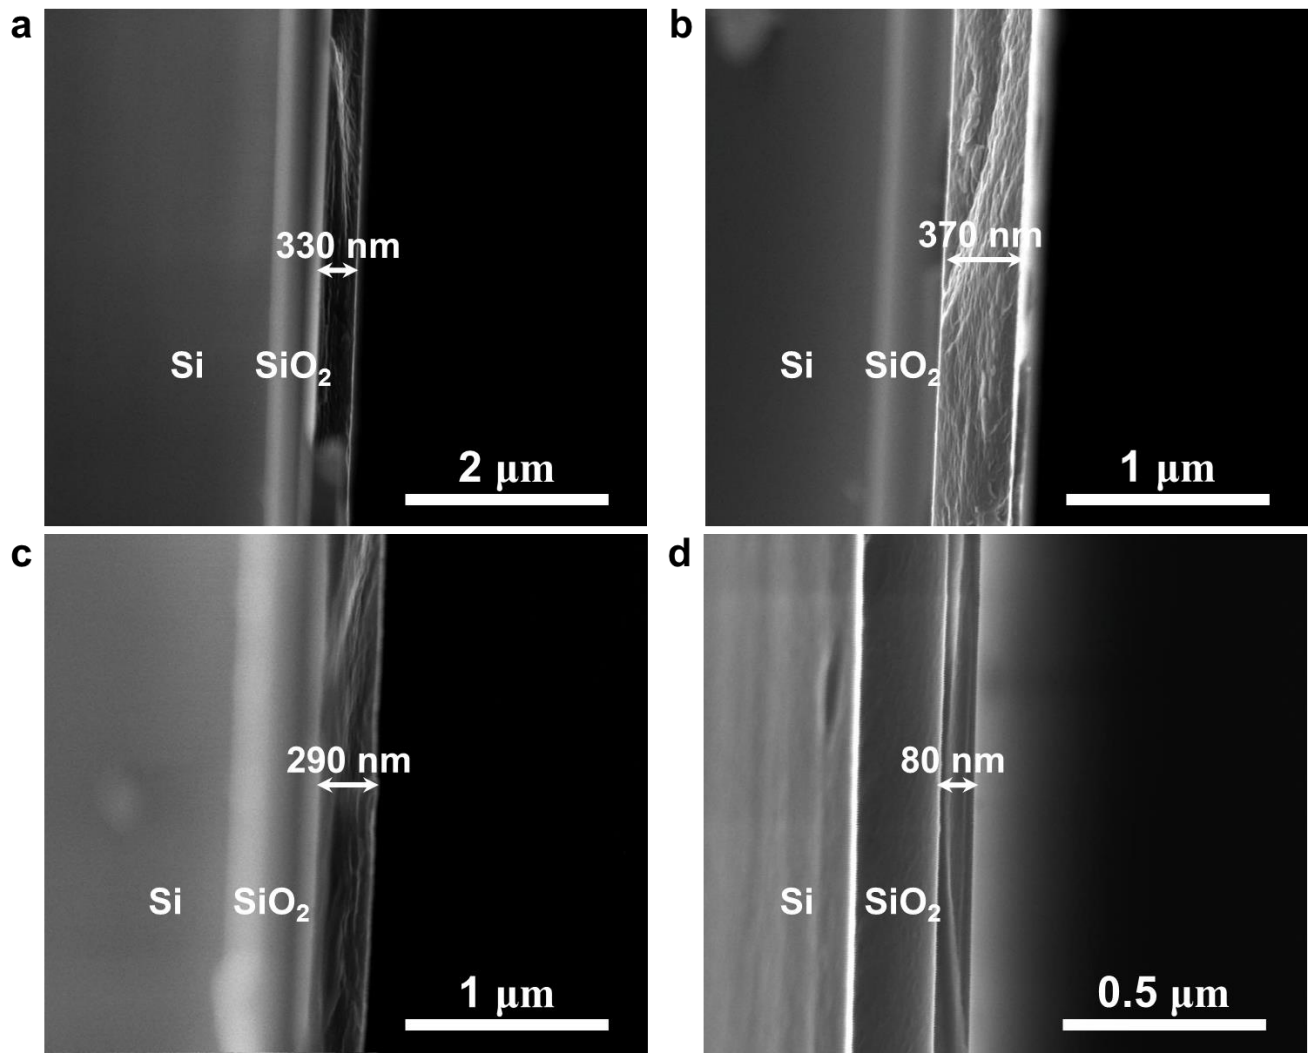

**Supplementary Figure 9** | SEM images obtained from cross-section of the C<sub>2</sub>N-h<sub>2</sub>D crystal films on SiO<sub>2</sub>(300 nm)/Si wafer with different thickness: **(a)** 330. **(b)** 370. **(c)** 290. **(d)** 80 nm.

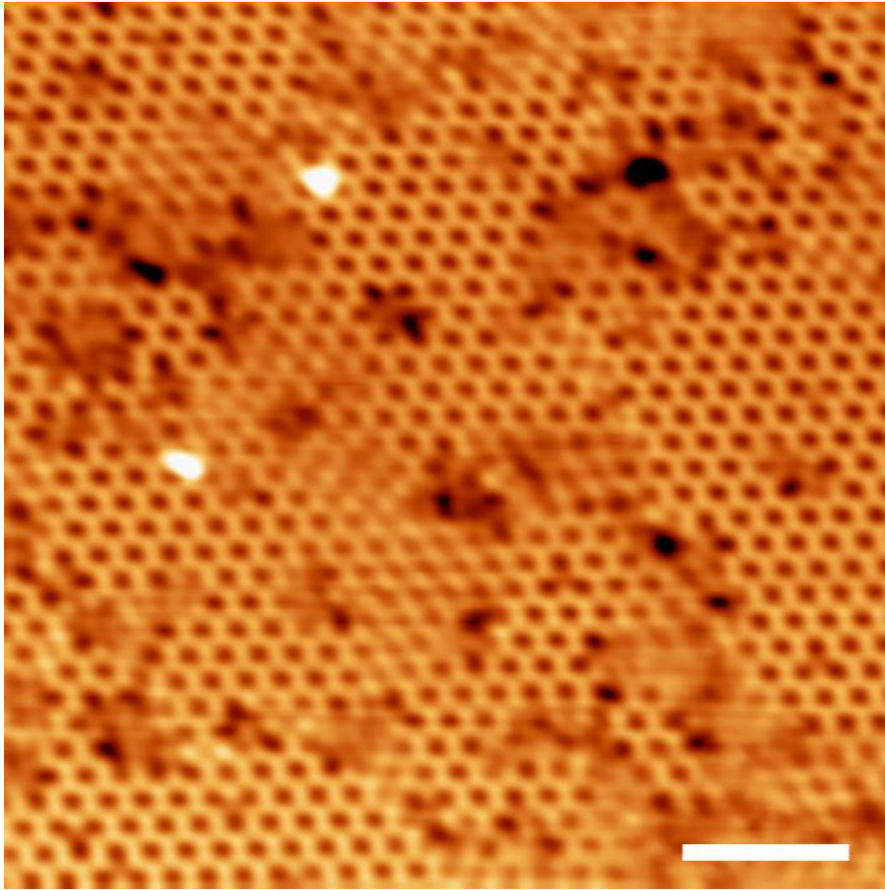

**Supplementary Figure 10** | A large-area STM topography image of the C<sub>2</sub>N-*h*2D crystal on Cu(111). High-resolution image is presented in Fig. 2a. Scale bar 5 nm.

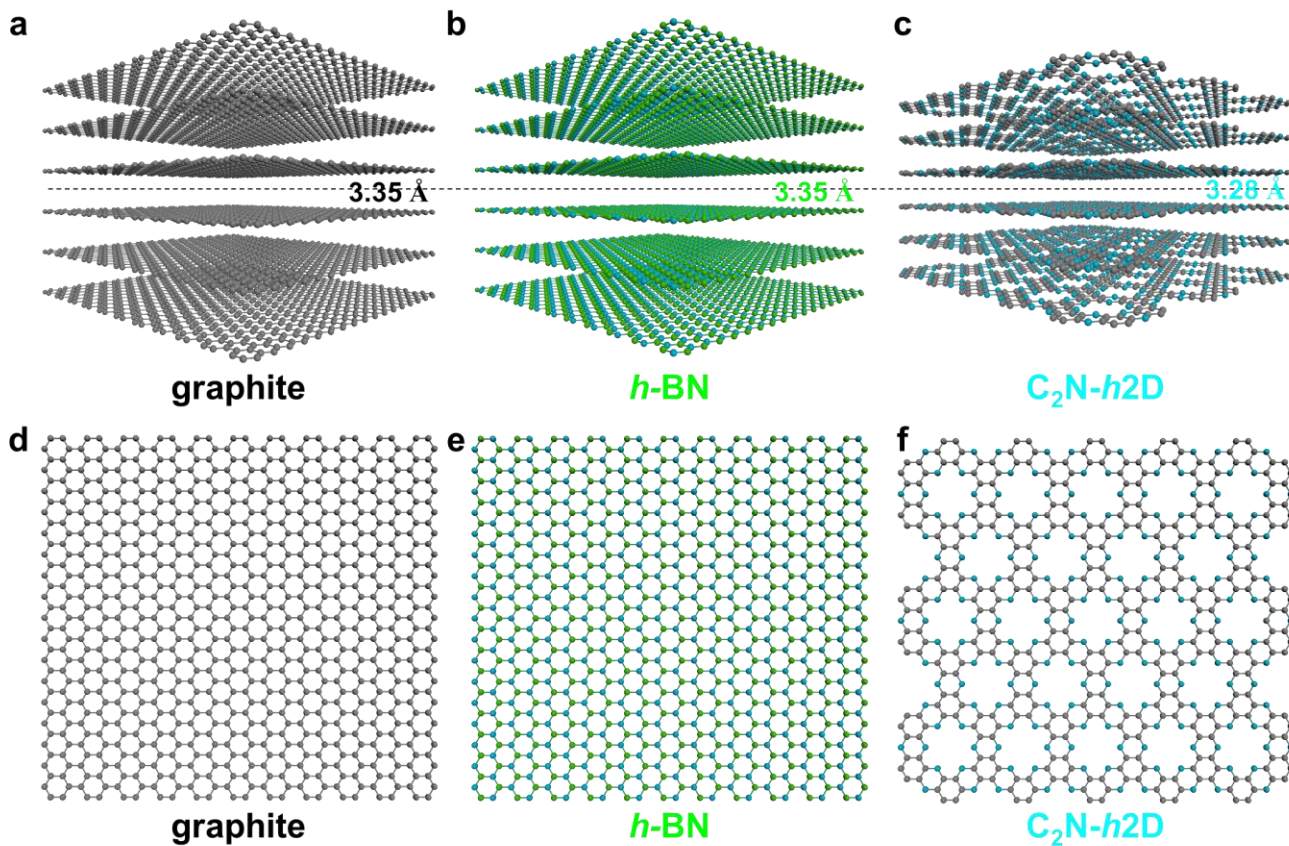

**Supplementary Figure 11** | Comparison of interlayer distances: **(a)** Graphite. **(b)** *h*-BN. **(c)** C<sub>2</sub>N-*h*2D crystal. Due to the differences in atomic sizes (covalent radii, B = 85, C = 77, N = 70 picometers), stacking patterns and charge polarizations, graphite and *h*-BN have very similar interlayer distance of 3.35 Å, while the C<sub>2</sub>N-*h*2D crystal has lower interlayer distance (3.28 Å). Structures of representative single layer 2D crystals: **(d)** Graphene. **(e)** *h*-BN. **(f)** C<sub>2</sub>N-*h*2D crystal.

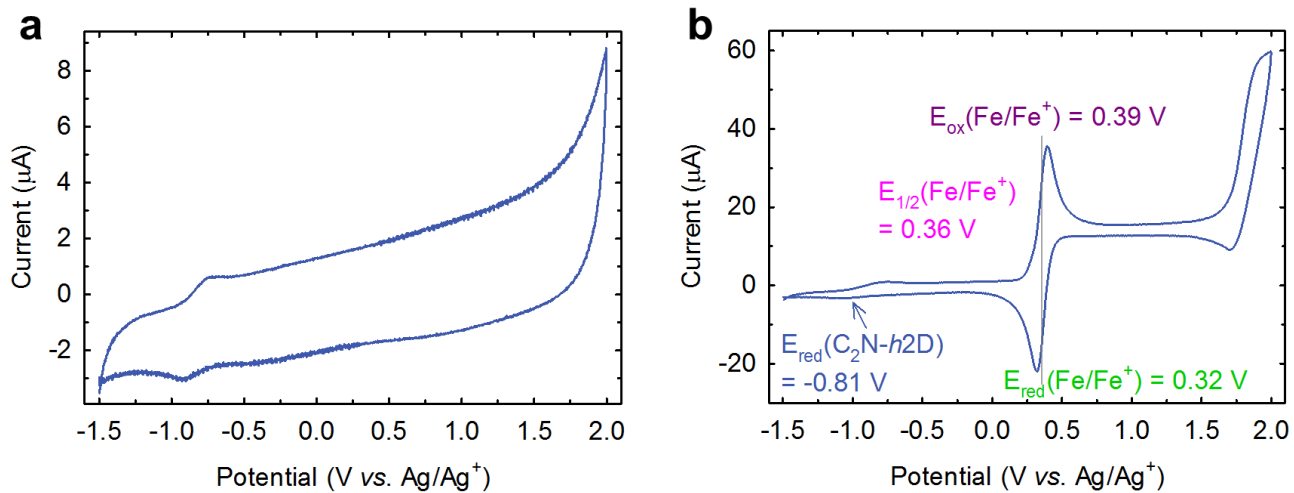

**Supplementary Figure 12** | Cyclic voltammograms (CV) of the  $\text{C}_2\text{N-h2D}$  crystal on GC electrode at a scan rate of  $100 \text{ mV s}^{-1}$  using an  $\text{Ag}/\text{Ag}^+$  reference electrode under  $\text{N}_2$  atmosphere: **(a)** Whole range curve, showing no oxidation peak for the  $\text{C}_2\text{N-h2D}$  crystal. **(b)**  $\text{C}_2\text{N-h2D}$  crystal in the presence of ferrocene, which was used as reference material.

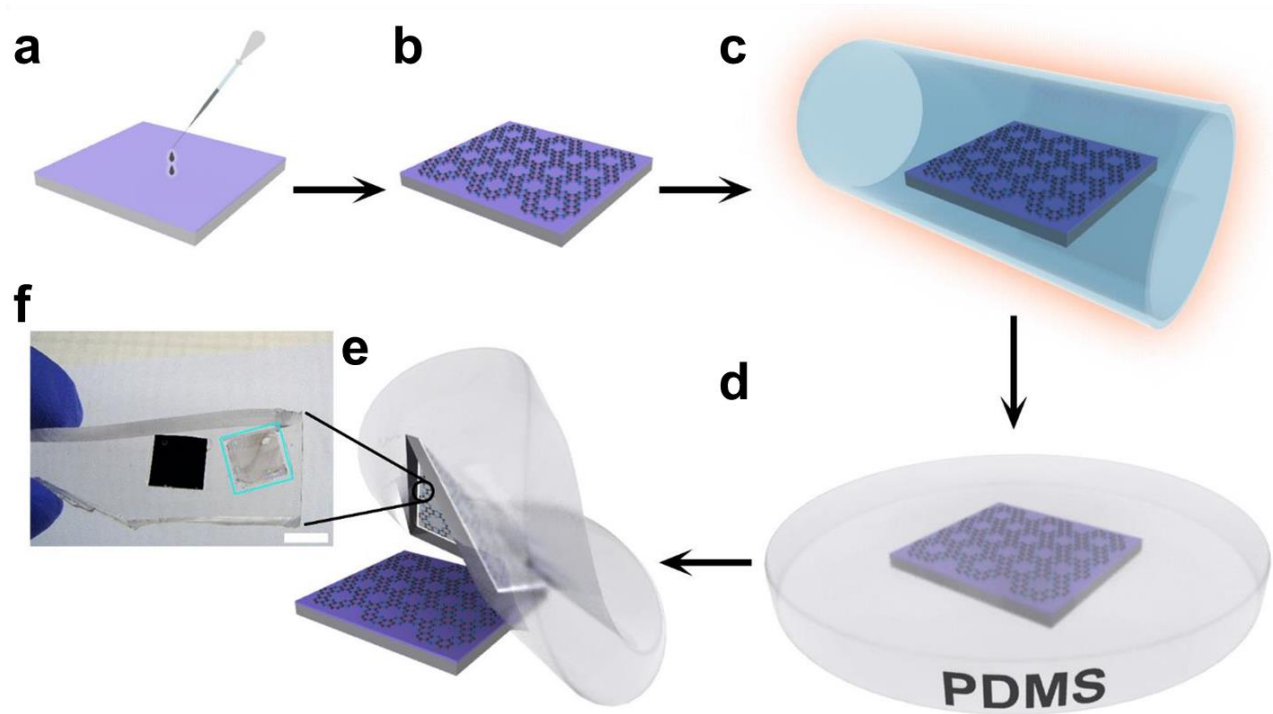

**Supplementary Figure 13** | Schematic illustration for the film fabrication of the C<sub>2</sub>N-h<sub>2</sub>D crystal using a PDMS mold: **(a)** 3–7  $\mu\text{L}$  of the C<sub>2</sub>N-h<sub>2</sub>D crystal solution was drop-coated onto the SiO<sub>2</sub>/Si wafer using pipette. **(b)** The solution was slowly dried at 90 °C. **(c)** After cooling the sample to room temperature, the sample was annealed at 700 °C for 2 hours under argon atmosphere. **(d)** PDMS precursor was poured onto the sample film on SiO<sub>2</sub>/Si wafer. **(e)** After curing the PDMS, which was carefully detached from the SiO<sub>2</sub>/Si wafer. **(f)** Film attached to the PDMS after removing SiO<sub>2</sub>/Si substrate is shown in the photograph (cyan blue square). Now the film can be transferred to any other desired substrate like SiO<sub>2</sub>/Si wafer for device study. The scale bar is 1 cm.

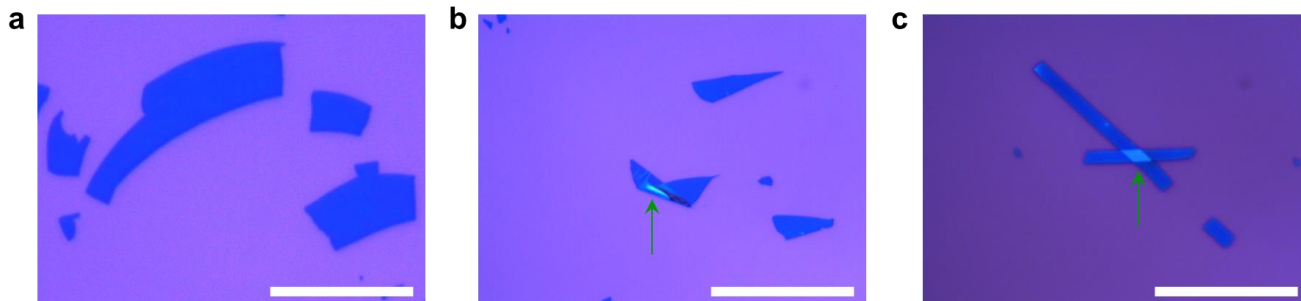

**Supplementary Figure 14** | Optical images of the  $C_2N$ - $h2D$  crystals on a  $SiO_2/Si$  wafer: **(a)** The  $C_2N$ - $h2D$  crystal can be obtained over micron scale size. **(b)** The  $C_2N$ - $h2D$  crystal is flexible (folded, cyan blue area). **(c)** Two  $C_2N$ - $h2D$  crystal flakes have crossed (cyan blue area). All scale bars are  $70\ \mu m$ .

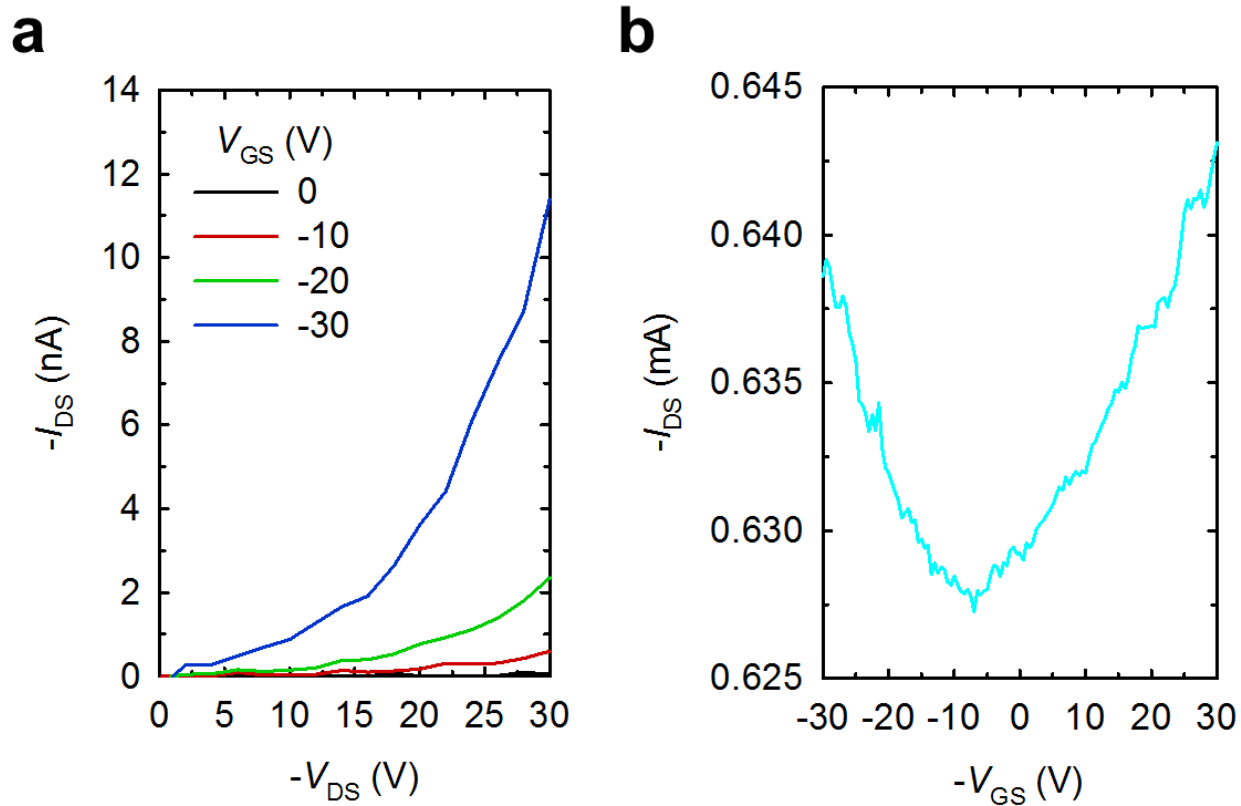

**Supplementary Figure 15** | (a) Output curve after annealing at 100 °C under  $5 \times 10^{-6}$  torr ( $V_{DS} = -30$  V). (b) Transfer curve of the  $C_2N-h_2D$  crystal field-effect transistor before annealing. The characterization was performed at 25 °C under  $5 \times 10^{-6}$  torr.

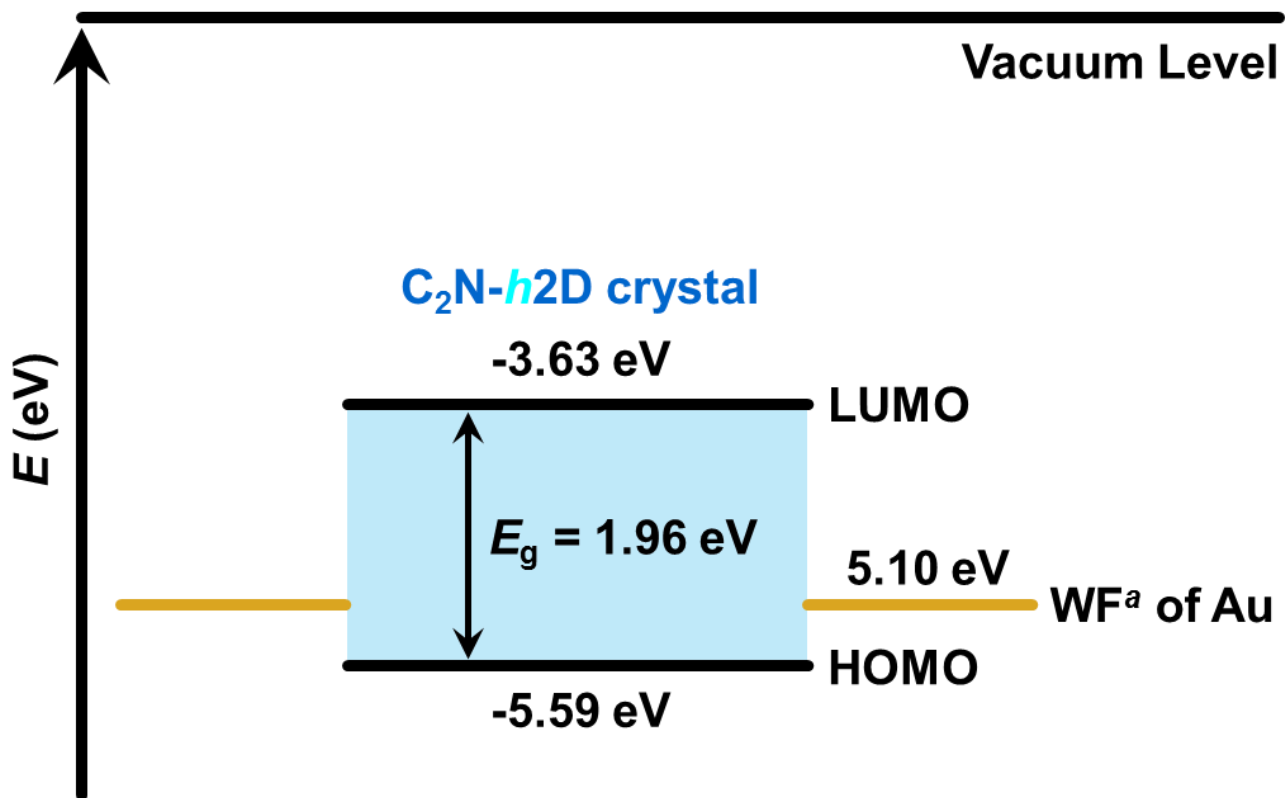

**Supplementary Figure 16** | Energy level diagram of the  $C_2N$ - $h2D$  crystal FET. The  $p$ -type operation of the FET is favorable with gold electrode according to the energy level diagram. <sup>a</sup> Work function.



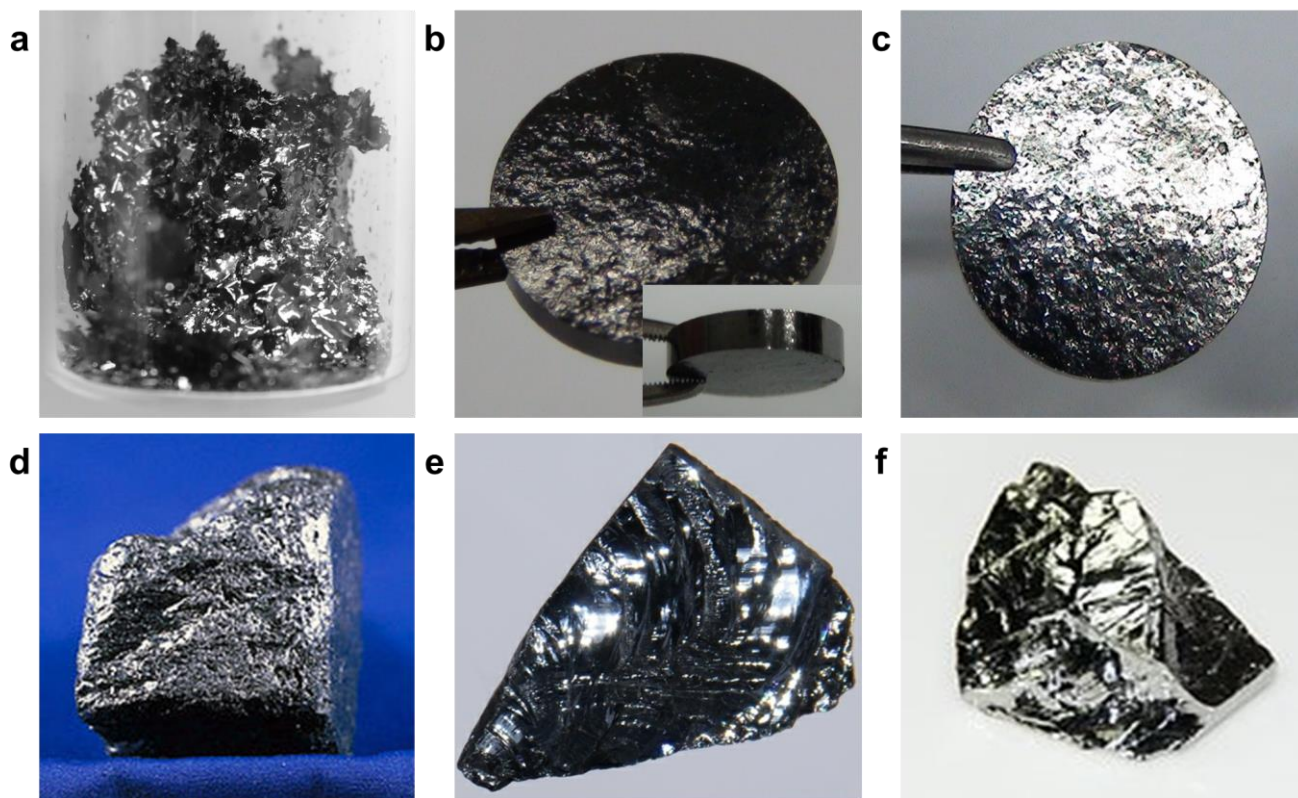

**Supplementary Figure 17** | Photographs: **(a)** Heat-treated  $C_2N-h_2D$  crystal at  $700\text{ }^\circ C$ . **(b)** As-compressed  $C_2N-h_2D$  crystal pellet by approximately 9000 bars. Inset is side-view of the pallet. **(c)** After annealing at  $700\text{ }^\circ C$ . **(d)** Graphite ore ([http://en.wikipedia.org/wiki/Graphite#cite\\_note-3](http://en.wikipedia.org/wiki/Graphite#cite_note-3)). **(e)** Silicon ore (<http://images-of-elements.com/silicon.php>). **(f)** Germanium ore (<http://images-of-elements.com/germanium.php>). All cases are showing the surface in the shiny reflected light.

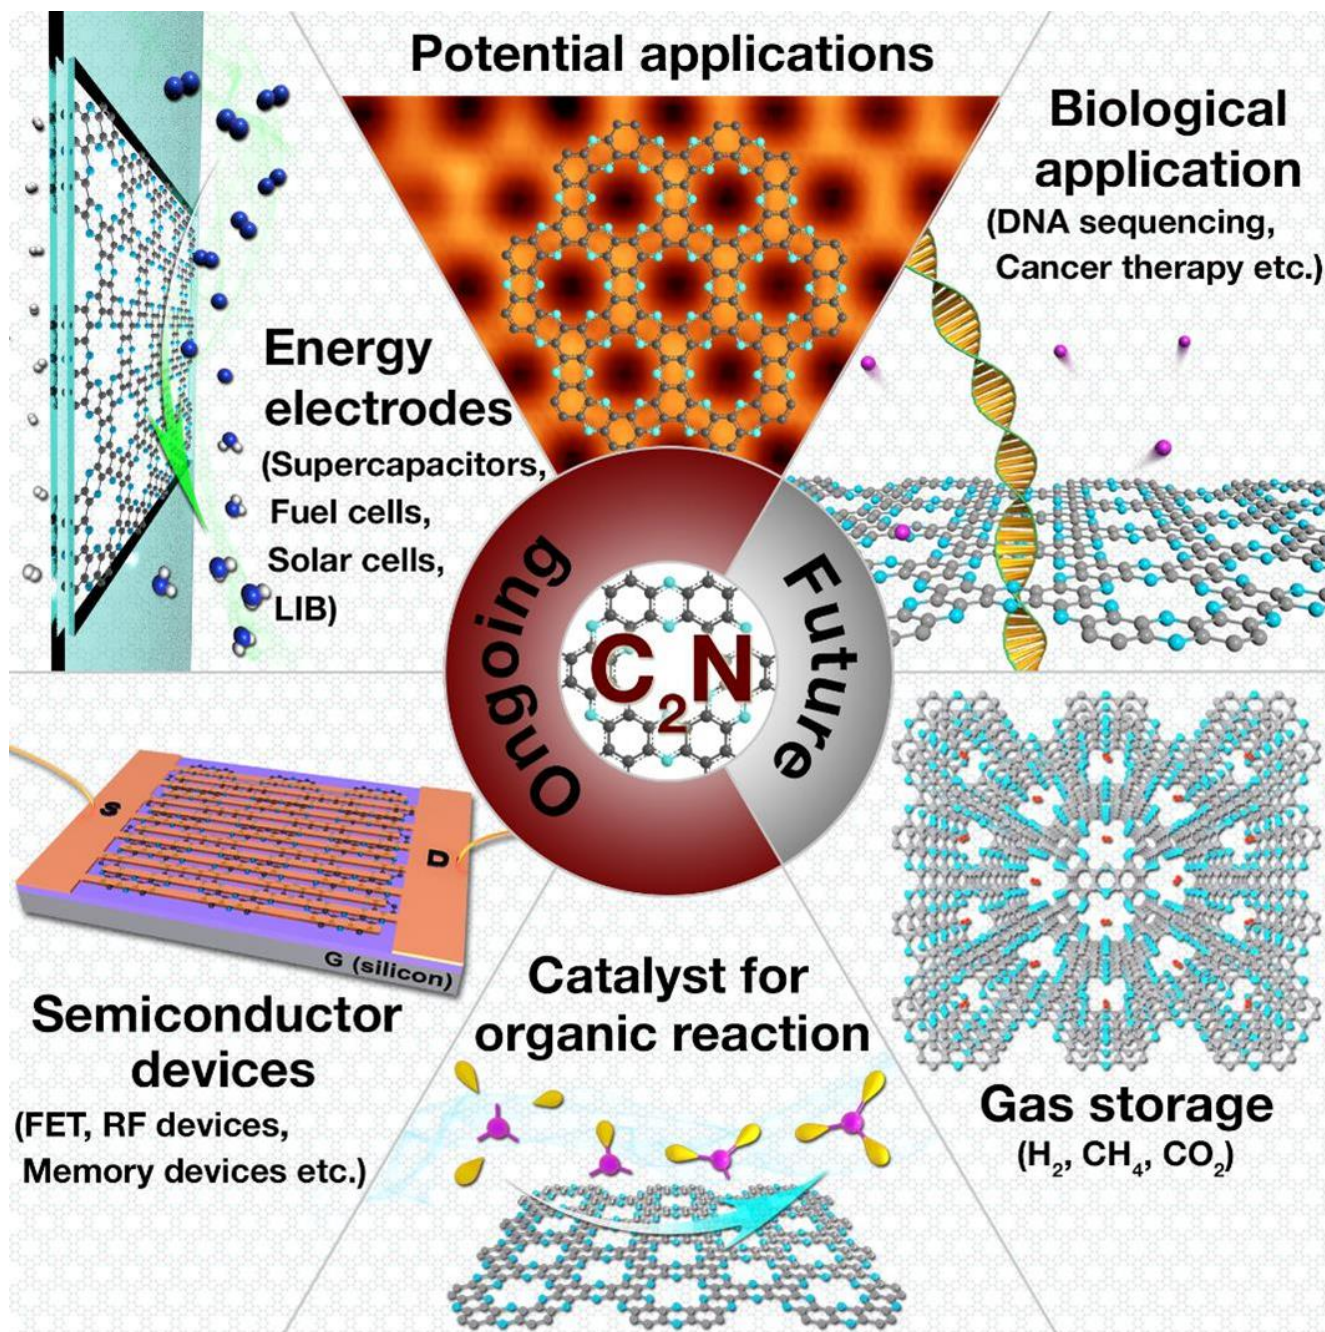

**Supplementary Figure 18** | Potential applications of the C<sub>2</sub>N-h<sub>2</sub>D crystal as a material for energy conversion and storage, semiconductor, catalyst, gas storage, biological and etc.

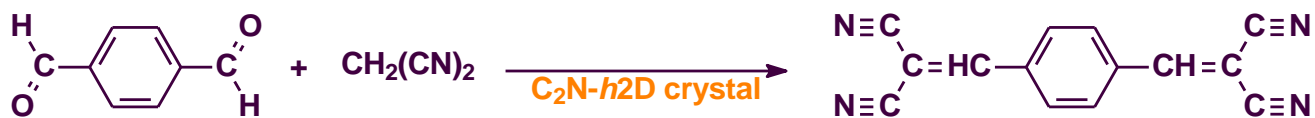

**Supplementary Figure 19** | Schematic presentation of Knoevenagel condensation reaction of terephthalaldehyde and malononitrile in the presence of the C<sub>2</sub>N-h<sub>2</sub>D crystal as a reaction catalyst.

**Supplementary Table 1** | Elemental composition of the C<sub>2</sub>N-*h*2D crystal from different characterization techniques

| <b>Technique</b>             | <b>C</b> | <b>H</b> | <b>N</b> | <b>O</b> | <b>Total</b> |
|------------------------------|----------|----------|----------|----------|--------------|
| <b>Theoretical (wt%)</b>     | 54.54    | 1.54     | 31.81    | 12.11    | 100          |
| <b>EA (wt%)<sup>a</sup></b>  | 49.53    | 3.04     | 20.90    | 26.46    | 99.93        |
| <b>XPS (at%)<sup>b</sup></b> | 66.49    |          | 17.89    | 15.62    | 100          |
| <b>SEM EDS (wt%)</b>         | 47.07    |          | 31.44    | 21.49    | 100          |
| <b>TEM EDS (wt%)</b>         | 52.93    |          | 35.96    | 11.11    | 100          |

<sup>a</sup> EA is most reliable element counts for bulk sample. The lower carbon content and the higher oxygen and hydrogen contents than theoretical calculation should be due to trapped small molecules (moisture, oxygen, and etc.) in the holes and interlayers of the C<sub>2</sub>N-*h*2D crystal.

<sup>b</sup> XPS is more sensitive to surface chemical composition.



**Supplementary Table 2** | Average (mean) electrical properties of the C<sub>2</sub>N-*h*2D crystal field-effect transistors

| <b>Electrical Characteristics<sup>a</sup></b>                        | <b>Electrical Performance</b>                   |
|----------------------------------------------------------------------|-------------------------------------------------|
| <b>Average off current<sup>b</sup> (A)</b>                           | 7.1 ( $\pm$ 4.1) <sup>c</sup> $\times 10^{-14}$ |
| <b>Maximum on/off ratio<sup>d</sup></b>                              | 4.6 $\times 10^7$                               |
| <b>Average on/off ratio<sup>e</sup></b>                              | 2.1 ( $\pm$ 3.9) $\times 10^5$                  |
| <b>Maximum mobility (cm<sup>2</sup>V<sup>-1</sup>s<sup>-1</sup>)</b> | 1.3 $\times 10^2$                               |
| <b>Average mobility (cm<sup>2</sup>V<sup>-1</sup>s<sup>-1</sup>)</b> | 6.5 ( $\pm$ 0.2) $\times 10^3$                  |

<sup>a</sup> 50 FET devices were measured under  $5 \times 10^{-6}$  torr.

<sup>b</sup> The off current was averaged over the turn-off state.

<sup>c</sup> The standard deviation.

<sup>d</sup> Calculated with the minimum off current.

<sup>e</sup> Calculated with the average off current.

**Supplementary Table 3 | Comparison of material properties**

| <b>Properties</b>                       | <b>C<sub>2</sub>N-<i>h</i>2D crystal</b>           | <b>Si</b>                        | <b><i>h</i>-BN</b> | <b>Graphene/<br/>graphite</b>           | <b>Advantages for<br/>C<sub>2</sub>N-<i>h</i>2D crystal</b> | <b>Ref.</b> |
|-----------------------------------------|----------------------------------------------------|----------------------------------|--------------------|-----------------------------------------|-------------------------------------------------------------|-------------|
| <b>History</b>                          | 2014                                               | 1824                             | 1844               | 2004                                    | New                                                         | 14-17       |
| <b>Band-gap (eV)</b>                    | 1.96 ( <i>c.a.</i> , 1.70)                         | 1.12                             | 5.05 - 6.40        | 0.00                                    | Well in the range of Semi-conductor                         | 18-22       |
| <b>ON/OFF ratio</b>                     | ~10 <sup>7</sup>                                   | ~10 <sup>5</sup>                 | --                 | <10                                     | High ON/OFF ratio                                           | 23,24       |
| <b>Dispersibility in solvents</b>       | Good                                               | --                               | --                 | Poor                                    | Solution processable                                        | 25          |
| <b>Bonds and structure</b>              | C=C, C=N ( <i>sp</i> <sup>2</sup> ) holey aromatic | Si-Si ( <i>sp</i> <sup>3</sup> ) | B-N                | C=C ( <i>sp</i> <sup>2</sup> ) aromatic | Heteroatom incorporated                                     |             |
| <b>Physical and electronic property</b> | Flexible semi-conductor                            | Brittle semi-conductor (SC)      | Brittle insulator  | Flexible conductor                      | 2D semiconductor                                            |             |
| <b>Physical appearance</b>              | Crystalline black powder                           | Shiny dark grayish solid         | White solid        | Crystalline black powder                | --                                                          |             |
| <b>Interlayer interactions</b>          | $\pi$ - $\pi$ & dipole-dipole                      | --                               | --                 | $\pi$ - $\pi$                           | Stronger interlayer interactions                            | 26          |

## Supplementary Note 1

In the high resolution C 1s spectrum, the dominant C 1s signals are centered at approximately 285.55 eV (graphitic  $sp^2$ C-C and  $sp^2$ C-N). The C1s spectra can be deconvoluted into 285.13, 286.23 and 288.8 eV (Fig. S5a). The peaks at 285.55 and 286.23 eV are assigned to  $sp^2$ C-C and  $sp^2$ C-N, respectively, in the aromatic ring, whereas the minor peak at 288.8 eV is attributed to the C-heteroatom, e.g.,  $sp^2$ C=O,  $sp^2$ C-NH<sub>2</sub> at the edges (see structure **1** in Fig. S2). The N 1s spectrum shows only one major peak at 399.56 eV for the pyrazine-like nitrogen in the system and a very small peak at 398.36 eV for the C-NH<sub>2</sub> at the edges (Figs. S4b and S5b)<sup>S1,2</sup>. The presence of O 1s peak in the C<sub>2</sub>N-*h*2D crystal can be attributed to the trapped substances such as moisture and O<sub>2</sub> in the holey structure (Fig. S5c), as well as the residual carbonyl (C=O) groups at the edges (see structure **1** in Fig. S2)<sup>3</sup>. Indeed, the heat-treated sample at 700 °C displayed a significantly reduced intensity of O 1s peak, while that of N 1s peak remained almost constant (Fig. S6). The result implies that the O1s peak before annealing has mostly contributed to the trapped substances in the holes and interlayers.

## Supplementary Note 2

**Measurement of LUMO and HOMO by cyclic voltammogram.** To investigate the LUMO energy level of the C<sub>2</sub>N-*h*2D crystal, the cyclic voltammogram was measured by using a standard three-electrode system, which consists of a glassy carbon as the working electrode, a platinum mesh as the counter electrode, and a silver wire as the reference electrode. Acetonitrile containing 0.1 M tetrabutylammonium hexafluorophosphate (TBAPF<sub>6</sub>) was used as the supporting electrolyte. The LUMO energy level of the C<sub>2</sub>N-*h*2D crystal was calculated according to the following equations (1-2):

$$\text{Fc/Fc}^+: 0.36 \text{ V vs. Ag/Ag}^+ \quad (1)$$

$$\text{LUMO (eV): } -4.8 - (E_{\text{onset}} - \text{Fc/Fc}^+) = -4.8 - (-0.81 - 0.36) = -3.63 \text{ eV} \quad (2)$$

All electrochemical measurements were carried out under an ambient pressure and nitrogen atmosphere.

- Working electrode: glassy carbon
- Counter electrode: Pt mesh
- Reference: Ag wire
- Electrolyte: 0.1 M TBAPF<sub>6</sub> in acetonitrile
- Scan rate: 100 mV/s
- Preparation of the C<sub>2</sub>N-*h*2D crystal on glassy carbon electrode: dropping and drying
- Fe/Fe<sup>+</sup>: 0.36 vs. Ag/Ag<sup>+</sup>
- E<sub>red</sub> as -0.81 V,
- LUMO (eV) :  $-4.8 - (E_{\text{onset}} - \text{Fc}/\text{Fc}^+) = -4.8 - (-0.81 - 0.36) = -3.63 \text{ eV}$
- **HOMO (eV): -3.63 eV-1.96 eV\* = -5.59 eV**

\* The optical band-gap of -1.96 eV was used to estimate HOMO value.

The optical HOMO-LUMO gap was found to be 1.96 eV. The LUMO value can also be experimentally estimated by onset of the redox potentials taking the known reference level for ferrocene, 4.8 eV below the vacuum level according to the equation<sup>4,5</sup>.

In our experiments, ferrocene exhibits an E<sub>1/2</sub> with a 0.36 V vs. Ag/Ag<sup>+</sup>. The onset reduction potential of -0.81 V vs. Ag/Ag<sup>+</sup> was determined by electrochemical measurements of the C<sub>2</sub>N-*h*2D crystal. Based on these data, the HOMO and LUMO can be calculated to be -5.59 and -3.63 eV, respectively. HOMO was calculated using the optical band-gap of 1.96 eV.

### Supplementary Note 3

**Fabrication of poly(dimethylsiloxane) (PDMS) molds and FET device.** An elastomeric PDMS molds were synthesized by curing PDMS precursor (Sylgard 184, Dow Corning Corp) on a heat



treated thin film of the C<sub>2</sub>N-*h*2D crystal on SiO<sub>2</sub>/Si substrate in a flat plastic petri dish. The PDMS precursor and curing agent (10:1 by weight) were mixed and degassed under vacuum to completely remove the bubbles. After curing overnight at 70 °C under vacuum, the film was transferred to the PDMS stamp from the SiO<sub>2</sub>/Si substrate. The PDMS stamp is then positioned over the SiO<sub>2</sub>/Si substrate and is pressed gently for about 20 second. Then the stamp is slowly removed so that the thinner flakes of C<sub>2</sub>N will remain on the cleaned SiO<sub>2</sub>/Si substrate for device fabrication. By PDMS stamping we were able to get very thin sheet of C<sub>2</sub>N for device fabrication and transport studies. In brief, 3-7 μL of solution (concentration, 0.1 mg mL<sup>-1</sup>) in trifluoromethanesulfonic acid (TFMSA) was drop casted onto a SiO<sub>2</sub>/Si wafer. After the slow evaporation of the solvent at 140 °C, the SiO<sub>2</sub>/Si wafer was annealed at 700 °C. Then, a small amount of poly(dimethylsiloxane) (PDMS) precursor was poured onto the sample. After curing the PDMS, the SiO<sub>2</sub>/Si wafer was detached away to obtain the sheets of the C<sub>2</sub>N-*h*2D crystal on another SiO<sub>2</sub>/Si wafer substrate on gently pressing. The resulting C<sub>2</sub>N-*h*2D crystal flakes could be prepared over micron scale sizes (Fig. S14a) with mechanical flexibility (Fig. S14b). The crossing area of the stacked crystals was brighter than the other thin part (Fig. S14c). Gold electrodes of the transistors were patterned with conventional e-beam lithography (the typical channel width-to-length ratio ( $W/L$ ) = 13,  $L$  = 500 nm) to construct bottom-gate top-contact FET. The hole motilities were extracted from the saturation regime of the transfer characteristics using the following equation (3):

$$I_{DS} = \frac{1}{2} \mu \frac{W}{L} C_i (V_{GS} - V_{th})^2 \quad (3)$$

where  $I_{DS}$  is the drain current,  $\mu$  is the field-effect mobility,  $C_i$  is the specific capacitance of the dielectric,  $V_{GS}$  is the gate voltage,  $V_{th}$  is the threshold voltage, and  $W$  and  $L$  are channel width and length.

## Supplementary Methods

**Materials.** All the solvents, chemicals and reagents were purchased from Aldrich Chemical Inc., unless otherwise stated. Anhydrous NMP and glacial acetic acid were degassed with nitrogen purging before use. All the reactions were performed under nitrogen atmosphere using oven dried glassware. 2,4,6-Trinitroaniline<sup>6</sup>, 1,3,5-triamino-2,4,6-trinitrobenzene<sup>7</sup> and 1,2,3,4,5,6-hexaaminobenzene trihydrochloride<sup>8</sup> were synthesized according to modified literature procedures.

**C<sub>2</sub>N-*h*2D crystal as a heterogeneous catalyst (Model reaction).** The C<sub>2</sub>N-*h*2D crystal efficiently catalyzes the Knoevenagel condensation reaction. Terephthaldehyde (2.00 g, 14.91 mmol) and malononitrile (1.97 g, 19.82 mmol) treated in benzene (50 mL) in the presence of the C<sub>2</sub>N-*h*2D crystal (100 mg) as a reaction catalyst. The reaction mixture was kept on stirring at room temperature overnight under nitrogen atmosphere. Then the reaction mixture was filtered to simply remove the insoluble catalyst. The filtrate was dried by rotary evaporator to give a yellowish solid residue in quantitative yield. After recrystallized from ethanol, purified was 95%. The recovered C<sub>2</sub>N-*h*2D crystal was repeatedly used three times, showing almost the same catalytic efficiency. <sup>1</sup>H NMR (600 MHz, DMSO) δ 8.08 (4H), 8.32 (2H); <sup>13</sup>C NMR (600 MHz, DMSO) δ 84.71, 112.75, 113.81, 130.85, 135.34, 159.81; HR-MS (ESI<sup>+</sup>) Calcd. for (C<sub>14</sub>H<sub>6</sub>N<sub>4</sub><sup>+</sup>) 230.0592, Found, 230.0591.

**First-principle calculations.** For computations, we used the Vienna *Ab initio* simulation package (VASP) to calculate the ground state of many electrons system in the frame work of density functional theory<sup>9-12</sup>. The plane-wave basis set with an energy cut-off of 400 eV and the PBE-type gradient-corrected exchange-correlation potential were employed<sup>13</sup>. The ions were described by the projector augmented wave (PAW) potentials. In the self-consistent-field total energy calculations, the k-points are uniformly sampled over the reciprocal space of the two-dimensional triangular lattice with mesh 21 by 21. All the atomic positions of were relaxed within residual forces smaller than 0.0eV/Å.

## Supplementary References

- 1 Huang, H. G., Wang, Z. H. & Xu, G. Q. The selective formation of di- $\sigma$  N–Si linkages in pyrazine binding on Si(111)- $7 \times 7$ . *J. Phy. Chem. B* **108**, 12560-12567 (2004).
- 2 Kou, Y., Xu, Y., Guo, Z. & Jiang, D. Supercapacitive energy storage and electric power supply using an aza-fused  $\pi$ -conjugated microporous framework. *Angew. Chem., Int. Ed* **50**, 8753-8757 (2011).
- 3 Yang, S., Feng, X., Wang, X. & Müllen, K. Graphene-based carbon nitride nanosheets as efficient metal-free electrocatalysts for oxygen reduction reactions. *Angew. Chem., Int. Ed* **50**, 5339-5343 (2011).
- 4 Wu, T.-Y., Sheu, R.-B. & Chen, Y. Synthesis and optically acid-sensory and electrochemical properties of novel polyoxadiazole derivatives. *Macromolecules* **37**, 725-733 (2004).
- 5 Kutner, W., Noworyta, K., Deviprasad, G. R. & D'Souza, F. Electrochemistry of solutions as well as simultaneous cyclic voltammetry and piezoelectric microgravimetry of conducting films of 2-(n-alkyl)fulleropyrrolidines. *J. Electrochem. Soc.* **147**, 2647-2652 (2000).
- 6 Hollernan, A. F. 1,3,4,5-Tetranitrobenzene. *Rec. trav. chim* **49**, 112 (1930).
- 7 Alexander R. Mitchell; Philip F. Pagoria; Robert D. Schmidt. Vicarious nucleophilic substitution using 4-amino-1,2,4-triazole, hydroxyleamine or O-alkylhydroxylamine to prepare 1,3-diamino-2,4,6-trinitrobenzene or 1,3,5-triamino-2,4,6-trinitrobenzen synthesis and purification of 1,3,5-triamino-2,4,6-trinitrobenzene (TATB). USA 5633406 patent (1997).
- 8 Mahmood, J., Kim, D., Jeon, I.-Y., Lah, M. S. & Baek, J.-B. Scalable synthesis of pure and stable hexaaminobenzene trihydrochloride. *Synlett* **24**, 246-248 (2013).
- 9 Hohenberg, P. & Kohn, W. Inhomogeneous electron gas. *Phy. Rev.* **136**, B864-B871 (1964).
- 10 Kohn, W. & Sham, L. J. Self-consistent equations including exchange and correlation effects. *Phy. Rev.* **140**, A1133-A1138 (1965).
- 11 Kresse, G. & Furthmüller, J. Efficient iterative schemes for ab initio total-energy calculations using a plane-wave basis set. *Phy. Rev. B* **54**, 11169-11186 (1996).

- 12 Kresse, G. & Furthmüller, J. Efficiency of ab-initio total energy calculations for metals and semiconductors using a plane-wave basis set. *Comput. Mater. Sci.* **6**, 15-50 (1996).
- 13 Perdew, J. P., Burke, K. & Ernzerhof, M. Generalized gradient approximation made simple. *Phys Rev Lett* **77**, 3865-3868 (1996).
- 14 Emsley, J. *Nature's Building Blocks: An A-Z Guide to the Elements.* 387 (Oxford University Press, 2002).
- 15 Novoselov, K. S. *et al.* Electric field effect in atomically thin carbon films. *Science* **306**, 666-669 (2004).
- 16 Balmain, W. H., Remarks about the formation of compounds of boron and silicon with nitrogen and certain metals. *J. Prakt. Chem.* **27**, 422-430 (1842).
- 17 Haubner, R., Wilhelm, M., Weissenbacher, R. & Lux, B. Vol. 102 *Structure & Bonding* (ed Martin Jansen) 1-45 (Springer Berlin/Heidelberg, 2002).
- 18 Ribeiro, R. M. & Peres, N. M. R. Stability of boron nitride bilayers: Ground-state energies, interlayer distances, and tight-binding description. *Phy. Rev. B* **83**, 235312 (2011).
- 19 Bao, Q. & Loh, K. P. Graphene photonics, plasmonics, and broadband optoelectronic devices. *ACS Nano* **6**, 3677-3694 (2012).
- 20 Vel, L., Demazeau, G. & Etourneau, J. Cubic boron nitride: synthesis, physicochemical properties and applications. *Mater. Sci. Eng.: B* **10**, 149-164 (1991).
- 21 Robertson, J. Electronic structure and core exciton of hexagonal boron nitride. *Phy. Rev. B* **29**, 2131-2137 (1984).
- 22 Schwierz, F. Graphene transistors. *Nat. Nanotechnol.* **5**, 487-496 (2010).
- 23 Ahn, J.-H. *et al.* High-speed mechanically flexible single-crystal silicon thin-film transistors on plastic substrates. *Electron Device Lett., IEEE* **27**, 460-462 (2006).
- 24 Rafiq, M. A. *et al.* High on/off ratio and multimode transport in silicon nanochains field effect transistors. *Appl. Phys. Lett.* **100**, - (2012).
- 25 Englert, J. M. *et al.* Covalent bulk functionalization of graphene. *Nat. Chem.* **3**, 279-286 (2011).

- 26 Neto, A. H. C. & Novoselov, K. New directions in science and technology: two-dimensional crystals.  
*Rep. Prog. Phys.* **74**, 082501 (2011).
